# Supplementary material for: Effect of contact with podiatry in a team approach context on diabetic foot ulcer and lower extremity amputation: systematic review and meta-analysis
Source: J Foot Ankle Res. 2020 Mar 20;13:15. doi: 10.1186/s13047-020-0380-8 (PMC7083052; doi:10.1186/s13047-020-0380-8)
Supplement: Supplementary file 5 — Additional file 5. Characteristics of included studies for meta-analysis – Contact with podiatrist in MDT context. [file 13047_2020_380_MOESM5_ESM.xlsx]

## Sheet: Feuil1
Characteristics of included studies for meta-analysis – Contact with podiatrist in MDT context
Study (author, country, year)	Type of study	n	Participants	Interventions	Description of the team/ members	Comparison	Outcomes	Length of follow up	Setting	Source of data	Stratification risk
Blanchette and al., Canada, 2019 [55]	Cohort pre and post	52	Pt with DFU, Pre: n = 11, Post: n = 41	Multidsciplinary pododiabetology center (PUC): best-practice Canadian guidelines, In-hospital offloadings	PUC: podiatrist and the interns in podiatry as a coordinator and collaboration with nurses, stoma therapist and physician of the WCC	Wound care clinic (WCC) with no podiatrist, external resource offloading modalities, best practice Canadian guidelines	DFUs: healing rate and time, LEAs	1 y	Outpatient clinic, tertiary	Chart reviews	Active DFU: High risk
Calle-Pascual and al., Spain, 2002 [36]	Cohort	220	Pt with neuropathy, compliance to the program, Low risk group a : n = 124, High risk group b : n = 184	Preventive foot care program (4 sessions of 120 min session held over 1 week (proper footwear, walking foot hygiene, callus care, nail cutting, water temperature checks, use of warming device, bathroom surgery, foot care products, shoe inspection and self-inspection), Continual foot care education and treatment with podiatry (30-60 min lessons based on personal characteristics of pt and/or relati…	Program supports,podiatry accessibility , no description of team	Non-compliant to the foot program – identical screening and educational program at the baseline	Number of ulcers (first vs all), incidence of DFUs, secondary outcome: number of LEAs	m : 4.6 years	Tertiary, outpatient clinic of the endocrinology service	Data from questionnaire, clinical report forms	Low and high
Crane and al., USA, 1999 [55]	Cohort	85	Pt admitted with a primary diagnosis of DF infections, CP : n = 60, NP : n = 25	Podiatry-established critical pathway (CP), first (6 months) = pt admitted to the CP by voluntary podiatry-only logarithmic approach from emergency rooms, after (12 months) = pt admitted from emergency room to the CP (not mandatory)	Podiatrists involved first line, no description of the team	Non-pathway patients group (NP), similar patients group (n = 115)	Hospital stays, charges, LEAs (Major/ minor), readmission	18 months	Inpatient setting, hospital, primary	Hospital database, chart reviews	High
Dargis and al., UK, 1999 [50]	Cohort	145	Pt with history of DFU, neuropathic, no PVD, Intervention: n = 56, Control: n = 89	Regular podiatry (callus removal, trimming nails, silicone orthoses, dressing and wound debridement, podiatric foot cares), education and re-education every 3 months (more often if required), footwear provision including insoles	Diabetologist, rehabilitation physician, orthopedic surgeon, podiatrist, shoemakers, nurse	No MDT (Education at baseline, nurse and diabetologist)	DFU recurrence, LEAs: major and minor rates, hospitalisation	24 months	Tertiary hospital, outclinic	Clinical report form, medical charts	High
Driver and al., USA, 2010 [47]	Cohort	485	Pt with stratification (UT classification) , History of DFU : n= 64, history of LEA : n= 45, - Podiatric limb preservation team : n = 311, comparison : n = 174	Podiatric lead limb preservation team: specialty podiatric medical care = comprehensive inpatient and outpatient evaluation and care, including state-of-the-art advanced wound care management, medical and surgical management of infection, at least a quarterly clinical visit, ongoing educational programs for patients and families, orthotic devices and extra-depth and custom shoes as required, no d…	Started as the foot-at-risk clinic as a part of podiatry service after incorporated into limb preservation team : podiatrist and vascular surgeon, pedorthist, wound-care nurse, and research unit	No specialty podiatric medical care , non -limb preservation team	Healthcare utilisation (Hospital stays), wound infection, DFU incidence, LEA, recurrence DFU, survival	60 months, m follow-up = 3.8 y	Tertiary care hospital	EMR, chart reviews	Unknown, Low risk, Active DFU: High risk (22%)
Huizing and al., Netherland, 2019 [59]	Cohort pre and post	237	Pt with DFUs,Pre: n = 104, Post: n = 133	Pt cares according to national guideline: wound cares, perfusion diagnosis and treatment, infection diagnosis and treatment, offloading, control blood glucose levels, cardiovascular risks management, appropriate footwear counselling, foot surgeries, education, evaluation of level of daily activities and functioning , pt’s consultation: once per week or every 2 weeks	MDT: vascular surgeon, physiatrist, internist, shoe technician, wound care nurse, cast technician, podiatrist; every member is present at the pt’s consultation -Referral by GPs	Pre: Vascular surgeon and wound care nurse,referred by GPs, sometime: intervention from- internist	Total LEAs (major or minor), death, time to heal DFUs,healing rate DFU, limb salvage	2 y	Tertiary, outpatient	EMR, clinical records, imaging reports, laboratory reports	Active DFU: High risk
Jiménez and al., Spain, 2017 [15]	Cohort pre and post	345553	Pt with LEA, grouped by sex and age pre and post	Post introduction of MDT : determines the diagnostic and management approach of each case according to the ICDF, and coordination with other specialties	MDT core and coordination : endocrinologist and podiatrist; After : coordination with other, disciplines : vascular surgery, general surgery, vascular and infectious disease, physical medicine and rehabilitation	Pre : introduction of MDT	LEAs (incidence), minor/major LEA, Hi-Low Ratio, in-hospital mortality, hospital stay	14 y, 7 y pre and 7 y post	Tertiary care hospital	Hospital database with coding	High
Nather and al., Singapore, 2010 [52]	Cohort pre and post	939	6 cohorts of pt stratified by LEAs risk King’s classification Stage 3-5 (ulcer, cellulitis, necrosis), Stage 6 (major amputation)	Post : Clinical pathway for pt with DF problem, stratified by orthopedic surgeon and 1st clinical examination, Part 1 : DF problem not requiring BKA or AKA, Part 2 : DF problem requiring BKA or AKA, referred to podiatrist (podiatry care education, footwear and appropriate discharge plan) and other members, before discharge : nurses and podiatrist educated pt individually and their family on foot …	DT led by orthopedic surgeon -Members : endocrinologist, infectious disease specialist, vascular surgeon, podiatrists, nurses specialised in foot care and foot screening, and case manager, seen by all members of the team	pre : introduction of MDT and clinical pathway	Hospitalisation (ALOS, cost per pt),major LEAs rate, readmission rate, complications rates	6 y , Pre : 1 y , between =: 1 y and Post : 4 y	Secondary, orthopedic department	Medical charts review, medical records	High
Plush and al., Australia, 2015 [53]	Cohort	156	Patients with diabetes type 1 or 2 with a primary admission for DF infection, HRFS: n = 40, Control: n = 116	Contact with MFT high-risk foot service (HRFS), no description of interventions specifically, n = 40	Specialist care from medical, surgical, nursing, podiatric, and allied health professional, emergency referral to MDT-HRFS within 24h	No contact with MDT-HRFS	LEA and level, Severity of infection , -length of hospital stay, hospital costs	12 months	Tertiary hospital	Electronic medical records, medical chart review	High
Sloan and al., UK, 2010 [44]	Cohort	Total combined: n = 189588	Pt separated in 4 stages of disease depending on severity of symptoms and signs, a Stage 1 n = 117 879, b Stage 2 n = 31 582, c Stage 3 n = 31 199, d Stage 4 n = 55 068	Care provided by podiatrists in combination with LEC specialists;algorithm for clinical implications for specialist in diagnosing and treating LEC ( HCPCS) base on severity stage of diseases	MDT = podiatrists with a combination of LEC specialists (general surgeons, orthopedic surgeons, radiologists, and, depending of the stage, dermatologists, neurologists, physical medicine and rehabilitation specialists, physical therapists, infectious disease specialists, and plastic and reconstructive surgeons.	Care by other health professionals	LEA rates and death	6 y	Unknown, Medicare patients setting	Medicare claims database	Stage 1 : Moderate risk, Stage 2 : High risk, Stage 3 : Active DFU, and Stage 4 : Active DFU
Wang and al., China, 2016 [16]	Cohort pre and post	648	Patients with DFUs, Stratification with Wagner classification [69], Pre : n = 133 and Post : n = 515	Post contact with MDT : Education, blood sugar control, wound debridement, advance dressings, offloading, surgery, and advanced therapies	MDT coordinated by endocrinologist and podiatrist, Nurses, orthopedics, plastic surgery, vascular surgery, nutritional department	Pre : Standardised pathway of diabetic foot patients	Rates LEA, level of amputation, hospitalisation	120 months (10 y)	Tertiary	Medical records	High (Active DFU)
Williams and al., UK, 2012 [49]	Cohort pre and post	9328	Patients with diabetes and/or PVD receiving inpatient treatment under care of vascular unit	Post : integrated DF service under overall care of vascular surgeon , rapid access pathways for patients with DF emergencies by the MDT, weekly podiatry, orthotic and vascular clinics running concurrently, optimizing multidisciplinary communication and management, improved provision for surgical debridement of wound clinic, coordinated fortnightly vascular and podiatry clinic review for patients …	MDT : consultant vascular surgeon and his team, vascular nurse specialist, 2 podiatrists with interest in DFUs, nurses with interest in lower-limb wound care, and orthotist	Pre : introduction of the integrated diabetic foot service in the vascular unit	Amputation rate, level of amputation, admission rates, length of stay, proportion of patients admitted in the MDT	6 y , 2 y pre foot service and 4 y post foot service	Secondary, vascular unit of a general district hospital	Clinical report forms, medical records,databases with coding	High
AKA: Above knee amputation, ALOS: Average length of stay in hospital, APRN: Advanced practical registered nurse, BKA: Below knee amputation, DC LEAP: Diabetes comprehensive LEA prevention program, DFU: diabetic foot ulcer, DF: diabetic foot, EMR: Electronic medical record, GP: general practitioner, HCPCS: Heath Care Financing Administration Common Procedure Coding System, ICDF International Conse…
